# Supplementary material for: Prevalence of Anemia among Children and Adolescents of Bangladesh: A Systematic Review and Meta-Analysis
Source: MDPI journal article supplement (doi:10.3390/ijerph20031786), 2023-01-18
Supplement: s1 [file s1]

**A**

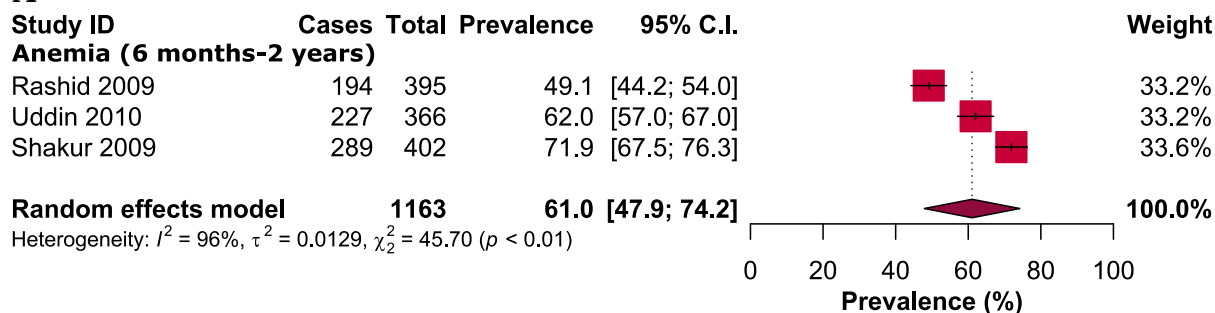

**B**

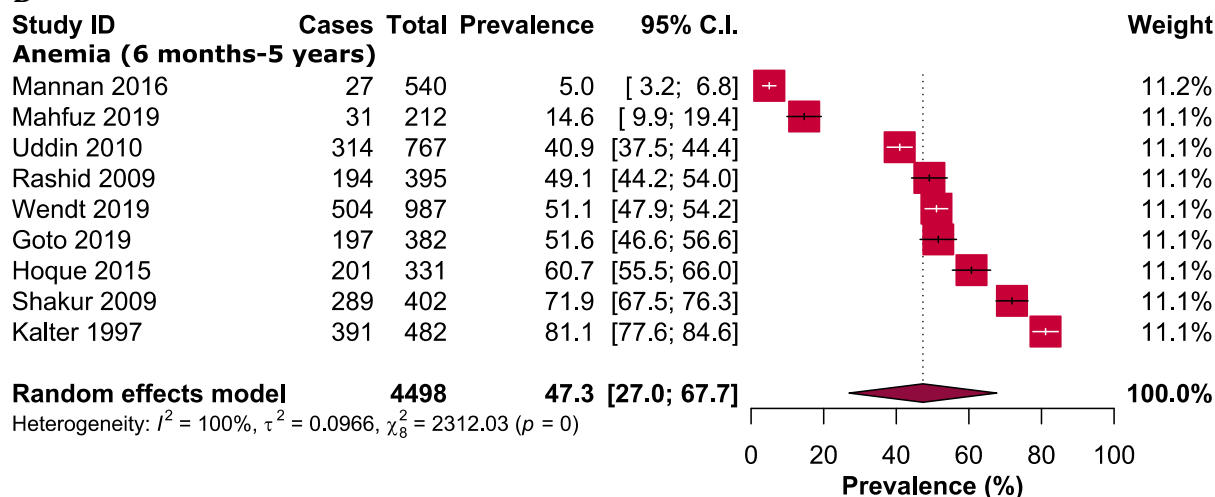

**C**

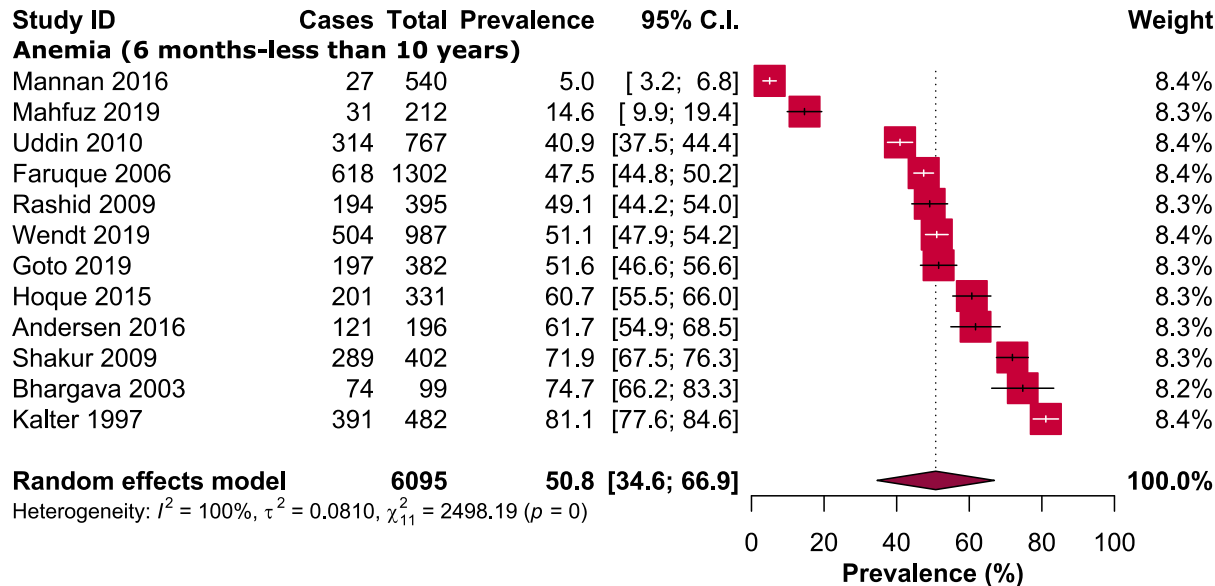

D

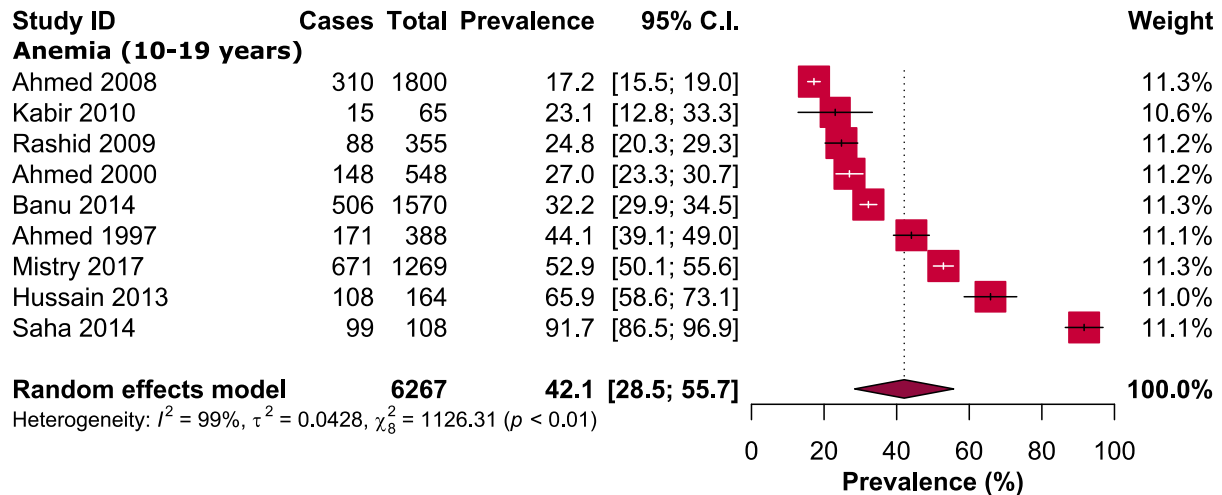

E

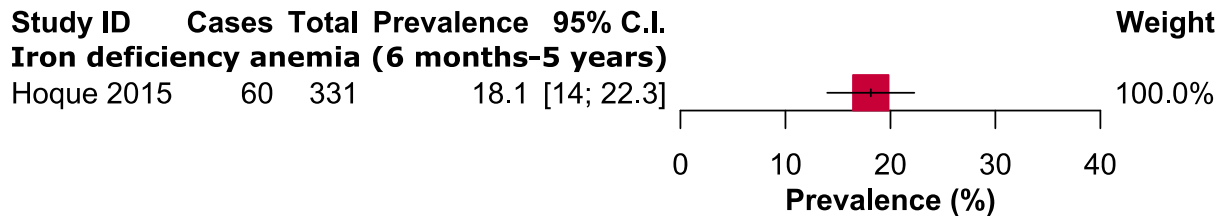

F

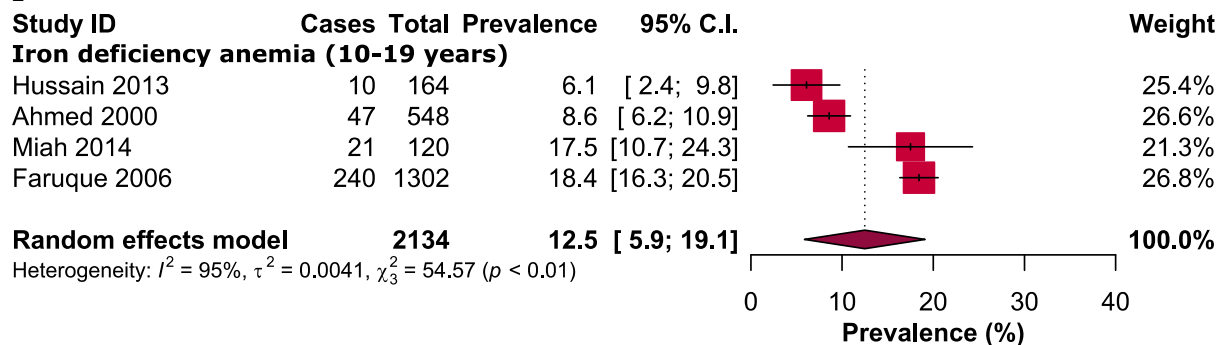

G

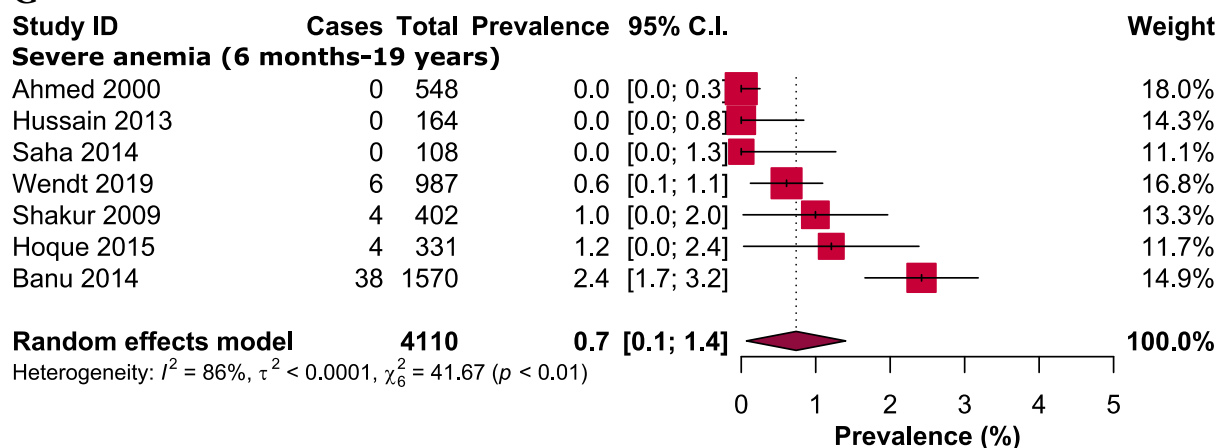

H

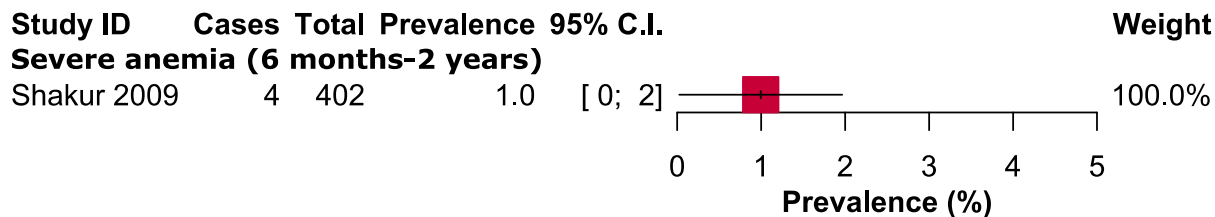

I

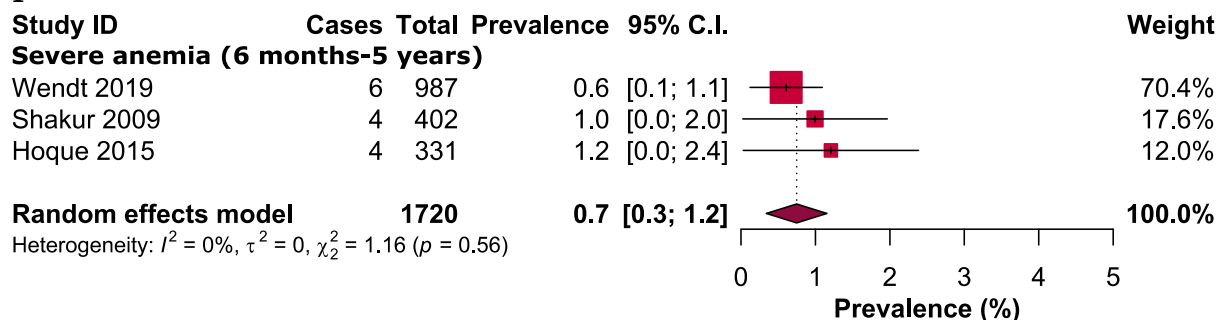

J

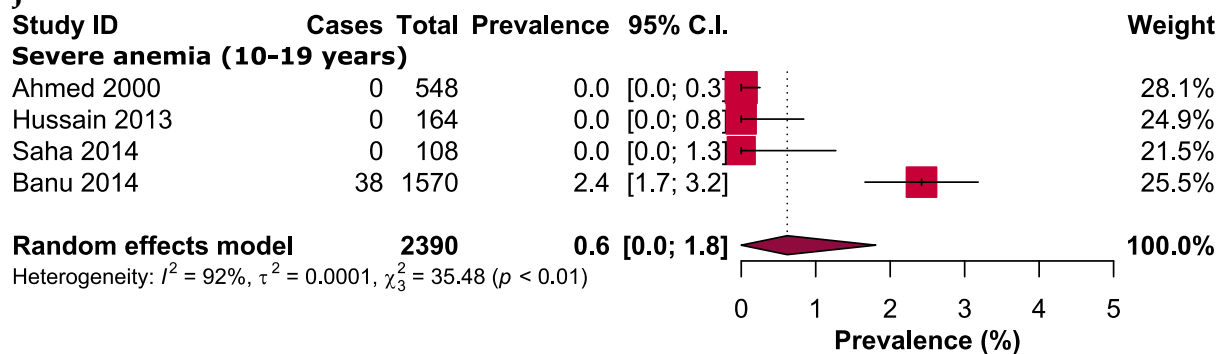

K

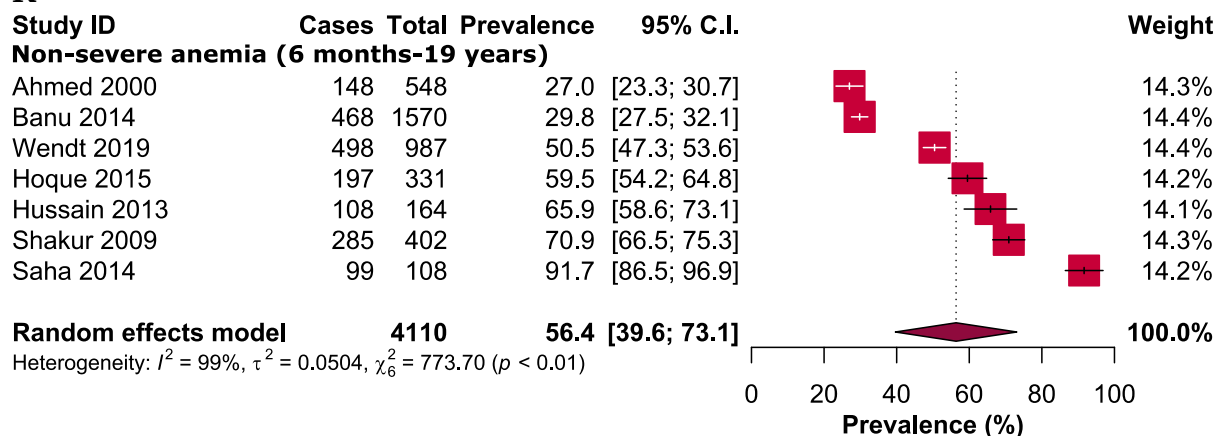

L

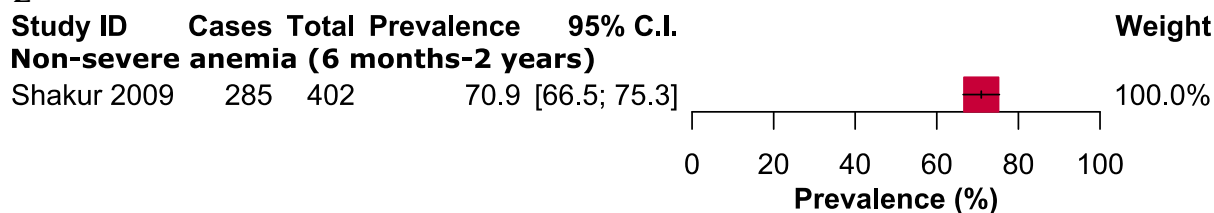

## M

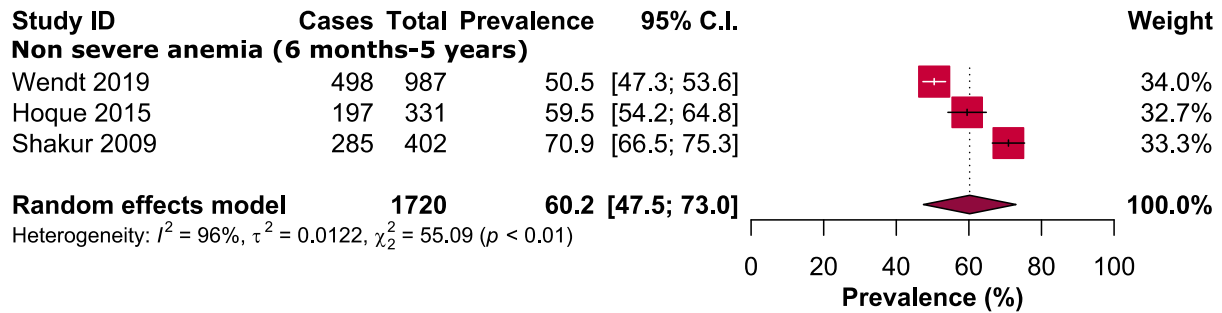

## N

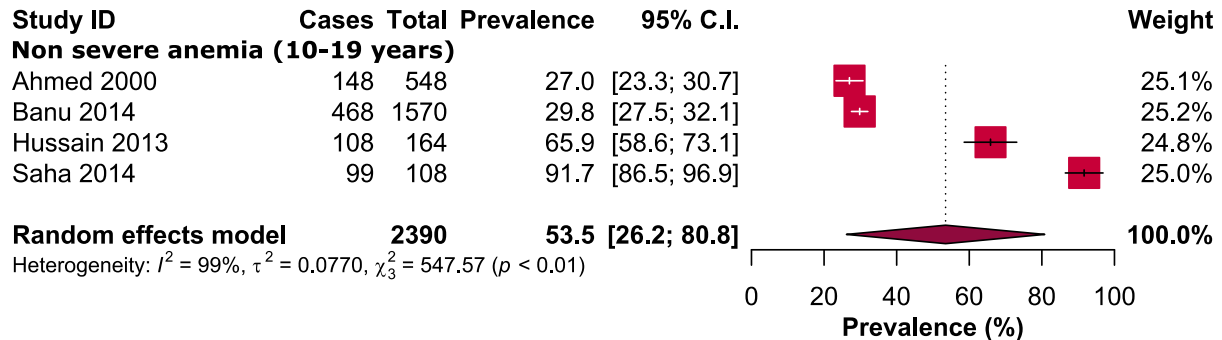

## O

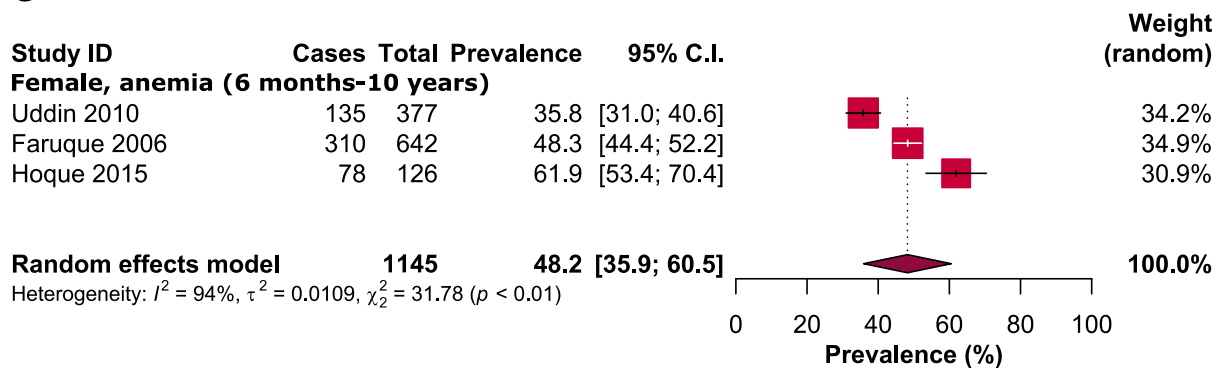

## P

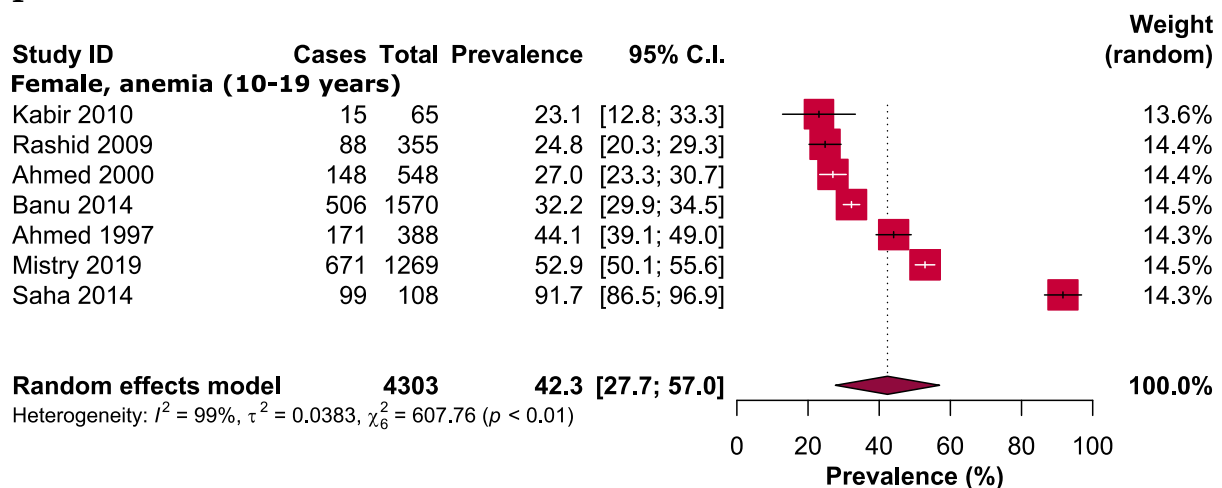

Q

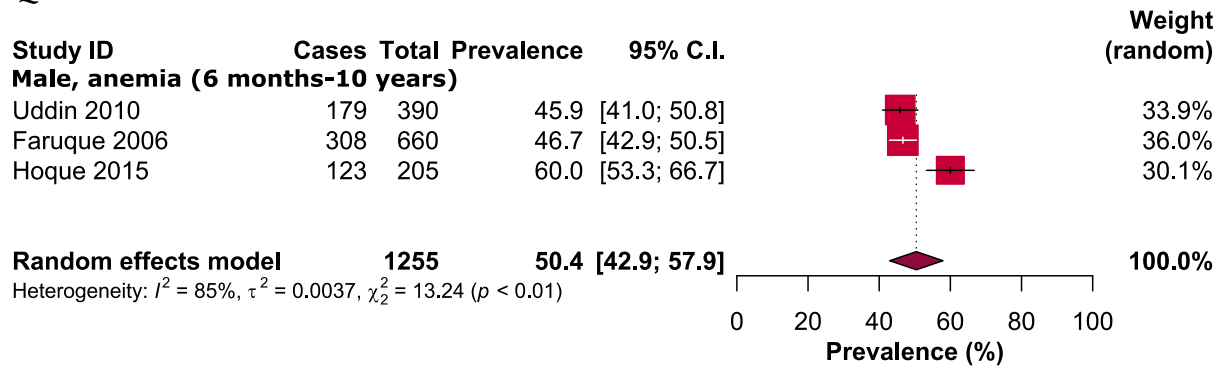

**Figure S1.** Subgroup analysis assessing the prevalence of anemia (A-D), iron deficiency anemia (E-F), severe anemia (G-J), non-severe anemia (K-N) in different age groups and gender (O-Q) of children and adolescents of Bangladesh.

**A**

| Study ID                                | Cases | Total | Prevalence | 95% C.I.     | Weight |
|-----------------------------------------|-------|-------|------------|--------------|--------|
| <b>Anemia (Excluding small studies)</b> |       |       |            |              |        |
| Mannan 2016                             | 27    | 540   | 5.0        | [ 3.2; 6.8]  | 6.7%   |
| Mahfuz 2019                             | 31    | 212   | 14.6       | [ 9.9; 19.4] | 6.6%   |
| Ahmed 2008                              | 310   | 1800  | 17.2       | [15.5; 19.0] | 6.7%   |
| Ahmed 2000                              | 148   | 548   | 27.0       | [23.3; 30.7] | 6.7%   |
| Banu 2014                               | 506   | 1570  | 32.2       | [29.9; 34.5] | 6.7%   |
| Rashid 2009                             | 282   | 750   | 37.6       | [34.1; 41.1] | 6.7%   |
| Uddin 2010                              | 314   | 767   | 40.9       | [37.5; 44.4] | 6.7%   |
| Ahmed 1997                              | 171   | 388   | 44.1       | [39.1; 49.0] | 6.6%   |
| Faruque 2006                            | 618   | 1302  | 47.5       | [44.8; 50.2] | 6.7%   |
| Wendt 2019                              | 504   | 987   | 51.1       | [47.9; 54.2] | 6.7%   |
| Goto 2019                               | 197   | 382   | 51.6       | [46.6; 56.6] | 6.6%   |
| Mistry 2017                             | 671   | 1269  | 52.9       | [50.1; 55.6] | 6.7%   |
| Hoque 2015                              | 201   | 331   | 60.7       | [55.5; 66.0] | 6.6%   |
| Shakur 2009                             | 289   | 402   | 71.9       | [67.5; 76.3] | 6.6%   |
| Kalter 1997                             | 391   | 482   | 81.1       | [77.6; 84.6] | 6.7%   |

**Random effects model**      **11730**      **42.3 [31.0; 53.7]**      **100.0%**  
Heterogeneity:  $I^2 = 100\%$ ,  $\tau^2 = 0.0498$ ,  $\chi^2_{14} = 2946.43$  ( $p = 0$ )

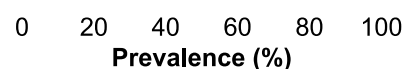

**B**

| Study ID                                                    | Cases | Total | Prevalence | 95% C.I.     | Weight |
|-------------------------------------------------------------|-------|-------|------------|--------------|--------|
| <b>Anemia (Excluding low- and moderate-quality studies)</b> |       |       |            |              |        |
| Mannan 2016                                                 | 27    | 540   | 5.0        | [ 3.2; 6.8]  | 6.3%   |
| Mahfuz 2019                                                 | 31    | 212   | 14.6       | [ 9.9; 19.4] | 6.2%   |
| Ahmed 2008                                                  | 310   | 1800  | 17.2       | [15.5; 19.0] | 6.3%   |
| Ahmed 2000                                                  | 148   | 548   | 27.0       | [23.3; 30.7] | 6.3%   |
| Banu 2014                                                   | 506   | 1570  | 32.2       | [29.9; 34.5] | 6.3%   |
| Rashid 2009                                                 | 282   | 750   | 37.6       | [34.1; 41.1] | 6.3%   |
| Uddin 2010                                                  | 314   | 767   | 40.9       | [37.5; 44.4] | 6.3%   |
| Ahmed 1997                                                  | 171   | 388   | 44.1       | [39.1; 49.0] | 6.2%   |
| Wendt 2019                                                  | 504   | 987   | 51.1       | [47.9; 54.2] | 6.3%   |
| Goto 2019                                                   | 197   | 382   | 51.6       | [46.6; 56.6] | 6.2%   |
| Mistry 2017                                                 | 671   | 1269  | 52.9       | [50.1; 55.6] | 6.3%   |
| Hoque 2015                                                  | 201   | 331   | 60.7       | [55.5; 66.0] | 6.2%   |
| Shakur 2009                                                 | 289   | 402   | 71.9       | [67.5; 76.3] | 6.2%   |
| Bhargava 2003                                               | 74    | 99    | 74.7       | [66.2; 83.3] | 6.1%   |
| Kalter 1997                                                 | 391   | 482   | 81.1       | [77.6; 84.6] | 6.3%   |
| Saha 2014                                                   | 99    | 108   | 91.7       | [86.5; 96.9] | 6.2%   |

**Random effects model**      **10635**      **47.1 [34.9; 59.2]**      **100.0%**  
Heterogeneity:  $I^2 = 100\%$ ,  $\tau^2 = 0.0610$ ,  $\chi^2_{15} = 3410.92$  ( $p = 0$ )

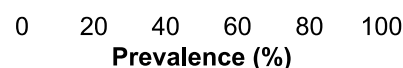

C

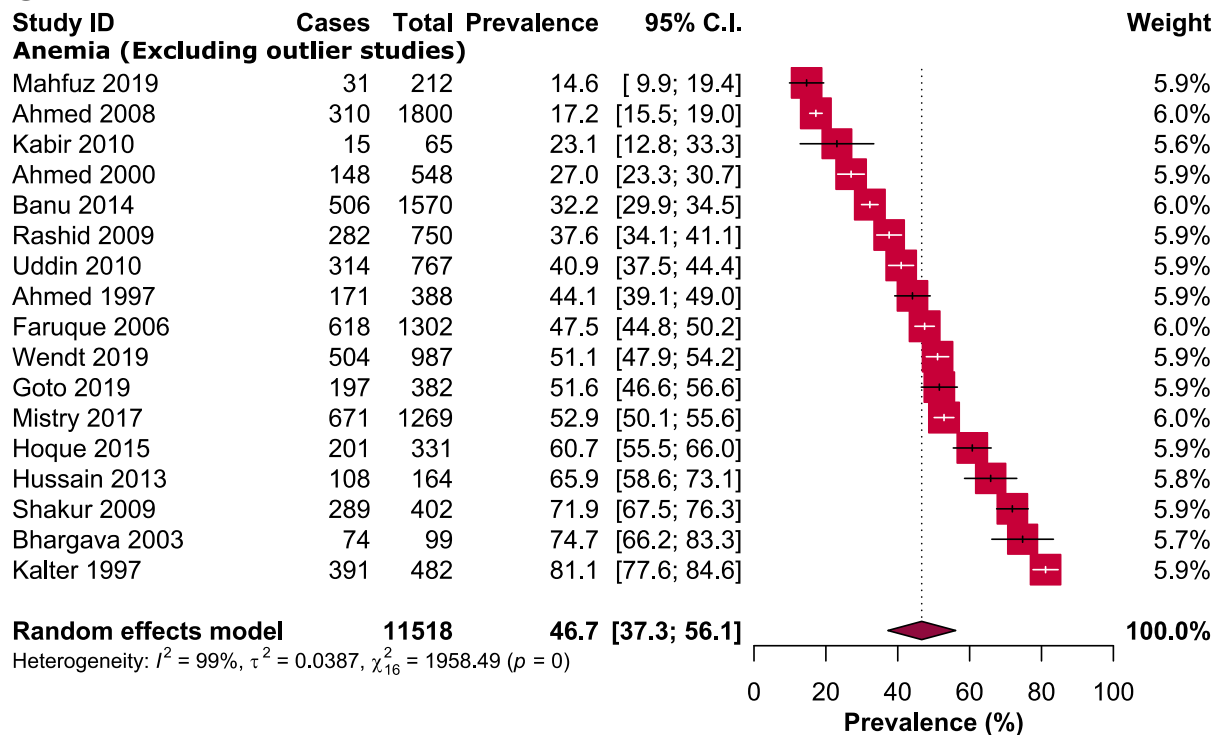

D

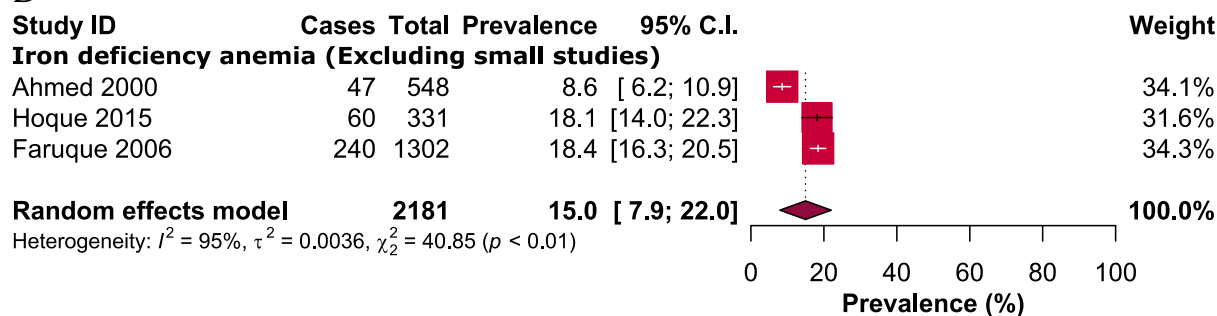

E

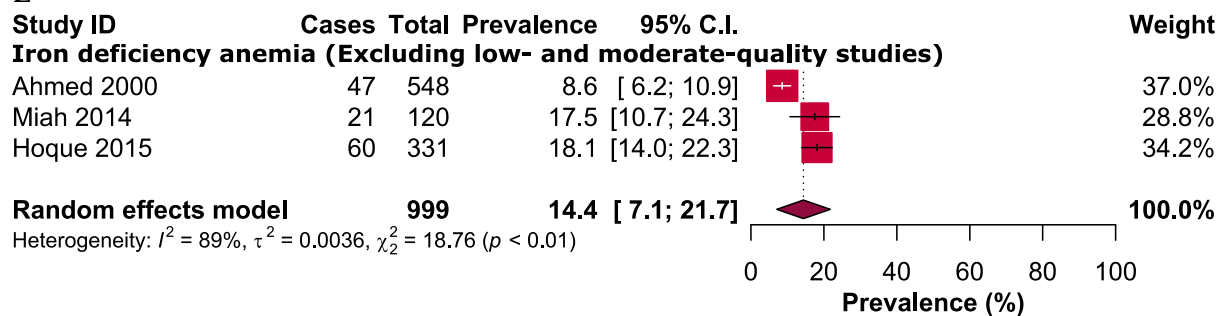

F

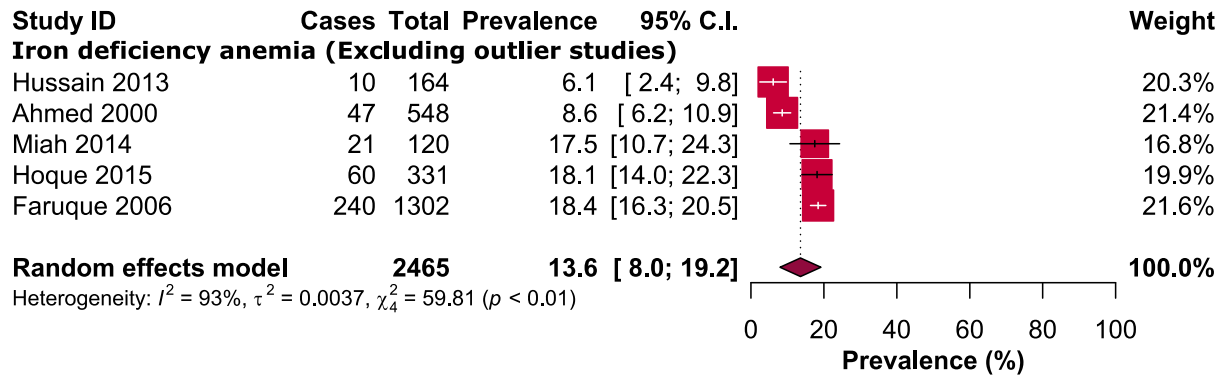

**Figure S2.** Sensitivity analysis assessing the prevalence of (A-C) anemia and (D-F) iron deficiency anemia in children and adolescents of Bangladesh.



**Table S1.** Search strategies

| Databases             | Search strategies                                                                                                                                                                                                                                                                                                                                                                                                                                                                                                                                                                       |
|-----------------------|-----------------------------------------------------------------------------------------------------------------------------------------------------------------------------------------------------------------------------------------------------------------------------------------------------------------------------------------------------------------------------------------------------------------------------------------------------------------------------------------------------------------------------------------------------------------------------------------|
| <b>PubMed</b>         | ((Anemia[Title/Abstract] OR Anaemia[Title/Abstract]) AND (Child* OR Adolescen* OR Pediatric* OR Paediatric*)) AND (Bangladesh OR Dhaka OR Chittagong OR Chattogram OR Rajshahi OR Rangpur OR Barisal OR Barishal OR Sylhet OR Khulna OR Mymensingh OR Dinajpur OR Bogra OR Bogura OR Comilla OR Cumilla OR Faridpur OR Pabna OR Noakhali OR "Cox's Bazar" OR Jessore OR Jashore OR Satkhira OR Gazipur OR Kushtia OR Sirajganj OR Gopalganj OR Jamalpur OR Gazipur OR Tangail OR Manikganj OR Patuakhali OR Rangamati OR Chandpur OR Netrakona OR Magura OR Naogaon OR Nilphamari)      |
| <b>Scopus</b>         | TITLE-ABS-KEY(Anemia OR Anaemia) AND TITLE-ABS-KEY(Child* OR Adolescen* OR Pediatric* OR Paediatric*) AND TITLE-ABS-KEY(Bangladesh OR Dhaka OR Chittagong OR Chattogram OR Rajshahi OR Rangpur OR Barisal OR Barishal OR Sylhet OR Khulna OR Mymensingh OR Dinajpur OR Bogra OR Bogura OR Comilla OR Cumilla OR Faridpur OR Pabna OR Noakhali OR "Cox's Bazar" OR Jessore OR Jashore OR Satkhira OR Gazipur OR Kushtia OR Sirajganj OR Gopalganj OR Jamalpur OR Gazipur OR Tangail OR Manikganj OR Patuakhali OR Rangamati OR Chandpur OR Netrakona OR Magura OR Naogaon OR Nilphamari) |
| <b>Google Scholar</b> | allintitle: (Anemia OR Anaemia) (Bangladesh OR Dhaka OR Chittagong OR Chattogram OR Rajshahi OR Rangpur OR Barisal OR Barishal OR Sylhet OR Khulna OR Mymensingh OR Dinajpur OR Bogra OR Bogura OR Comilla OR Cumilla OR Faridpur OR Pabna OR Noakhali OR "Cox's Bazar" OR Jessore OR Jashore OR Satkhira OR Gazipur OR Kushtia OR Sirajganj OR Gopalganj OR Jamalpur OR Gazipur OR Tangail OR Manikganj OR Patuakhali OR Rangamati OR Chandpur OR Netrakona OR Magura OR Naogaon OR Nilphamari)                                                                                        |

**Table S2.** Quality assessment of the cross-sectional studies

| No | Study ID         | Critical appraisal checklist |   |   |   |   |   |   |   | Yes (%) |
|----|------------------|------------------------------|---|---|---|---|---|---|---|---------|
|    |                  | 1                            | 2 | 3 | 4 | 5 | 6 | 7 | 8 |         |
| 1  | Ahmed 1997       | Y                            | Y | N | Y | Y | Y | Y | Y | 87.5    |
| 2  | Ahmed 2000       | Y                            | Y | Y | Y | Y | Y | Y | Y | 100.0   |
| 3  | Ahmed 2006       | Y                            | Y | Y | Y | Y | Y | Y | Y | 100.0   |
| 4  | Ahmed 2008       | Y                            | Y | N | Y | Y | Y | Y | Y | 87.5    |
| 5  | Banu 2014        | Y                            | Y | Y | Y | N | N | Y | Y | 75.0    |
| 6  | Begum 2017       | Y                            | Y | N | N | N | N | Y | U | 37.5    |
| 7  | Bhargava 2003    | Y                            | Y | Y | Y | N | N | Y | Y | 75.0    |
| 8  | Faruque 2006     | Y                            | Y | N | Y | N | N | Y | Y | 62.5    |
| 9  | Hoque 2015       | Y                            | Y | Y | Y | Y | Y | Y | Y | 100.0   |
| 10 | Hussain 2013     | Y                            | Y | N | N | N | N | Y | Y | 50.0    |
| 11 | Kabir 2010       | Y                            | Y | N | Y | N | N | Y | Y | 62.5    |
| 12 | Kalter 1997      | Y                            | Y | Y | Y | N | N | Y | Y | 75.0    |
| 13 | Miah 2014        | Y                            | Y | Y | Y | N | N | Y | Y | 75.0    |
| 14 | Mistry 2017      | Y                            | Y | Y | Y | Y | Y | Y | Y | 100.0   |
| 15 | Persson 2000     | Y                            | Y | U | Y | Y | Y | Y | Y | 87.5    |
| 16 | Rashid 2009      | Y                            | Y | Y | Y | Y | Y | Y | Y | 100.0   |
| 17 | Saha 2014        | Y                            | Y | Y | Y | N | N | Y | Y | 75.0    |
| 18 | Shahabuddin 2000 | Y                            | Y | Y | Y | U | N | Y | Y | 75.0    |
| 19 | Shakur 2009      | Y                            | Y | Y | Y | Y | Y | Y | Y | 100.0   |
| 20 | Uddin 2010       | Y                            | Y | Y | Y | N | N | Y | Y | 75.0    |
| 21 | Wendt 2019       | Y                            | Y | Y | Y | Y | Y | Y | Y | 100.0   |

1. Were the criteria for inclusion in the sample clearly defined? 2. Were the study subjects and the setting described in detail? 3. Was the exposure measured in a valid and reliable way? 4. Were objective, standard criteria used for measurement of the condition? 5. Were confounding factors identified? 6. Were strategies to deal with confounding factors stated? 7. Were the outcomes measured in a valid and reliable way? 8. Was appropriate statistical analysis used? Y: Yes, N: No, U: Unclear.

**Table S3.** Quality assessment of the cohort studies

| No | Study ID    | Critical appraisal checklist |   |   |   |   |   |   |   |   |    |    | Yes (%) |
|----|-------------|------------------------------|---|---|---|---|---|---|---|---|----|----|---------|
|    |             | 1                            | 2 | 3 | 4 | 5 | 6 | 7 | 8 | 9 | 10 | 11 |         |
| 1  | Adams 2017  | Y                            | Y | Y | Y | Y | Y | Y | Y | N | N  | Y  | 81.8    |
| 2  | Goto 2019   | Y                            | Y | Y | Y | Y | Y | Y | Y | Y | NA | Y  | 100.0   |
| 3  | Mahfuz 2019 | Y                            | Y | Y | Y | Y | Y | Y | Y | Y | NA | Y  | 100.0   |
| 4  | Mannan 2016 | Y                            | Y | Y | Y | Y | Y | Y | Y | Y | NA | Y  | 100.0   |

1. Were the two groups similar and recruited from the same population? 2. Were the exposures measured similarly to assign people 3. to both exposed and unexposed groups? 4. Was the exposure measured in a valid and reliable way? 5. Were confounding factors identified? 6. Were strategies to deal with confounding factors stated? 7. Were the groups/participants free of the outcome at the start of the study (or at the moment of exposure)? 8. Were the outcomes measured in a valid and reliable way? 9. Was the follow up time reported and sufficient to be long enough for outcomes to occur? 10. Was follow up complete, and if not, were the reasons to loss to follow up described and explored? 11. Were strategies to address incomplete follow up utilized? 12. Was appropriate statistical analysis used? Y: Yes, N: No, NA: Not applicable
